# Supplementary material
Source: Royal Society of Chemistry journal article supplement (doi:10.1039/d6dd00056h)
Supplement: d6dd00056h1.pdf [file d6dd00056h1.pdf]

# 1 Contents

|   |   |                                        |    |
|---|---|----------------------------------------|----|
| 2 | 1 | Dimer Extraction.....                  | 3  |
| 3 | 2 | Active Learning Workflow.....          | 4  |
| 4 | 3 | Random Sampling.....                   | 5  |
| 5 | 4 | Accuracy and Efficiency Benchmark..... | 6  |
| 6 | 5 | Exploring NCI patterns in PDB.....     | 8  |
| 7 | 6 | Supporting Information Tables.....     | 9  |
| 8 |   | References.....                        | 12 |

9  
10  
11

12

13

14

15

16

17

18

19

# 1 Dimer Extraction

2 Dimers were extracted from protein structures using an in-house script. For each type of  
3 fragment, a corresponding SMARTS<sup>1</sup> pattern was generated, and SMILES<sup>2</sup> patterns were also  
4 employed to define the three-dimensional templates. Substructure searches across all collected  
5 proteins were then carried out through SMARTS-based substructure matching implemented in  
6 RDKit<sup>3</sup> Python package. The coordinates of matching atoms of each hit were mapped onto the  
7 template atoms defined by corresponding SMILES patterns. When isolation of the fragment  
8 required cleavage of a C–C or C–N bond, the bond was cut at the appropriate position, the  
9 resulting terminal atom was first marked as a dummy atom, and then capped with hydrogen to  
10 maintain valency.

11       Once 17 chemical groups had been collected from a given protein, dimers were searched  
12 for by identifying fragment pairs in close spatial proximity. Each interacting pair was initially  
13 labeled as the shortest distance between 2 and 4 Å. And the residue in which two fragments are  
14 located should be separated by at least 2 amino acids to avoid bias from proximity effects.

15

16

17

18

# 1 2 Active Learning Workflow

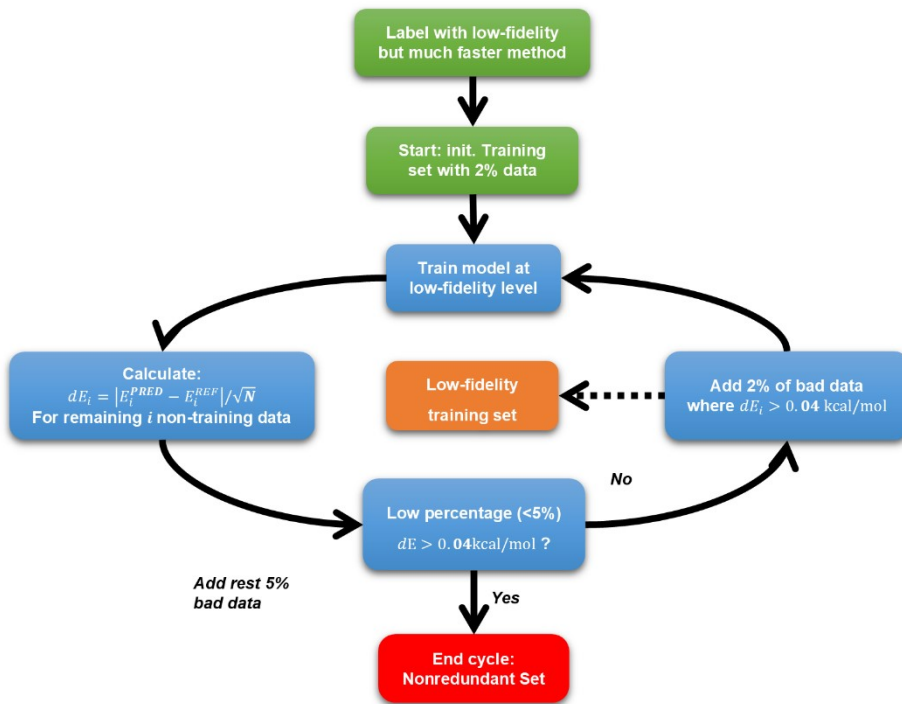

2

3 **Figure S1.** Active learning workflow for data redundancy.

4

5

6

7

8

9

10

11

12

# 1 3 Random Sampling

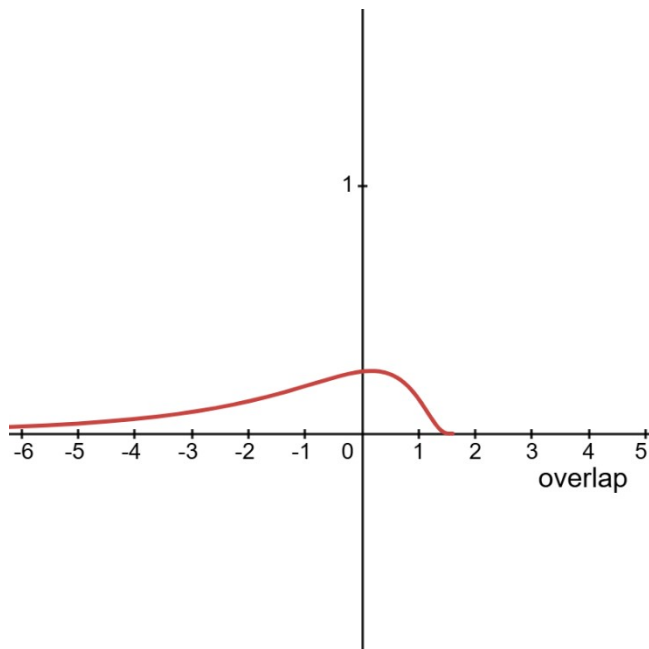

2

3 **Figure S2.** Acceptance probability curve for intermolecular overlap used in random sampling.

4 Curve visualization generated via <https://www.desmos.com/calculator/a8imk7uszg>.

5

6

7

8

9

10

11

12

13

14

15

## 1 4 Model Performance on Benchmark Sets

a

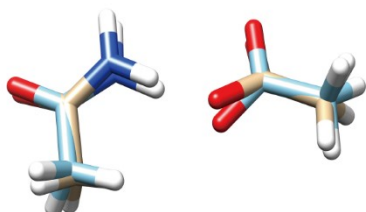

b

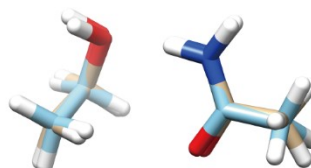

2

3 **Figure S3.** Conformational changes observed in post-optimization. Initial lowest-energy  
4 structures (tan) and their optimized counterparts (sky blue) exhibit minimal structural deviations,  
5 as quantified by root-mean-square deviation (RMSD) values of (a) 0.399 Å for ACEM-ACET  
6 and (b) 0.352 Å for ACEM-ETOH.

7

8

9

10

11

12

13

14

15

16

17

18

# 1 5 Comparison with ANI-2x

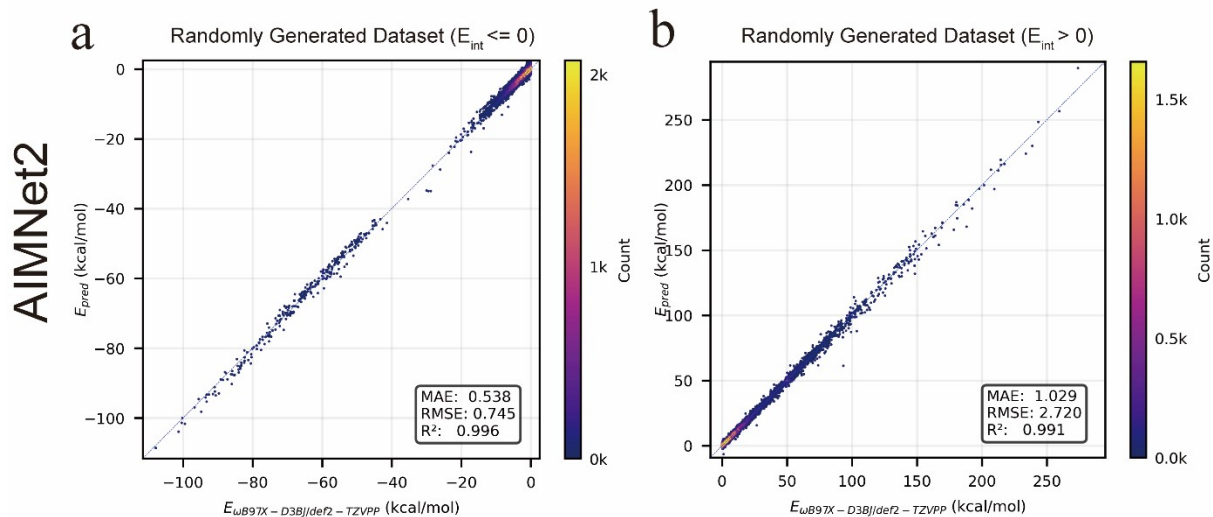

2

3 **Figure S4.** Interaction energies calculated at  $\omega B97X-D3BJ/def2-TZVPP$  level and predicted by  
4 AIMNet2 for the randomly generated dataset with interaction energy below 0 kcal/mol (a), and  
5 above 0 kcal/mol (b).

6

7

8

9

10

11

12

# 6 Exploring NCI Patterns in PDB

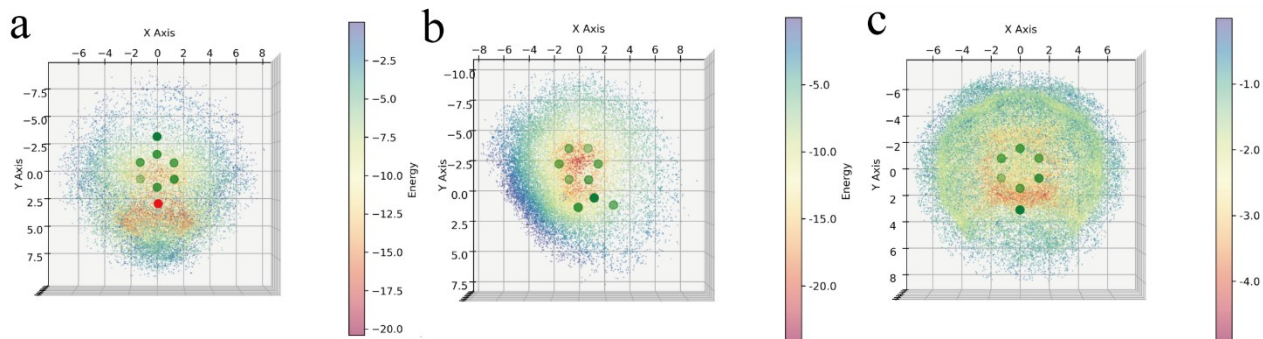

2

3 **Figure S5.** Bottom view of spatial distributions for ETAM-PMPO (a), ETAM-MIND (b), and  
4 MBZ-MSM (c). Each scatter point represents the position of the fragment's central atom (N or S)  
5 relative to the central fragment. The color of each scatter point corresponds to the energy scale  
6 shown in the adjacent color bar. Circles on the xy-plane represent heavy atoms of the central  
7 fragment: green for carbon atoms, red for oxygen atoms, and blue for nitrogen.

8

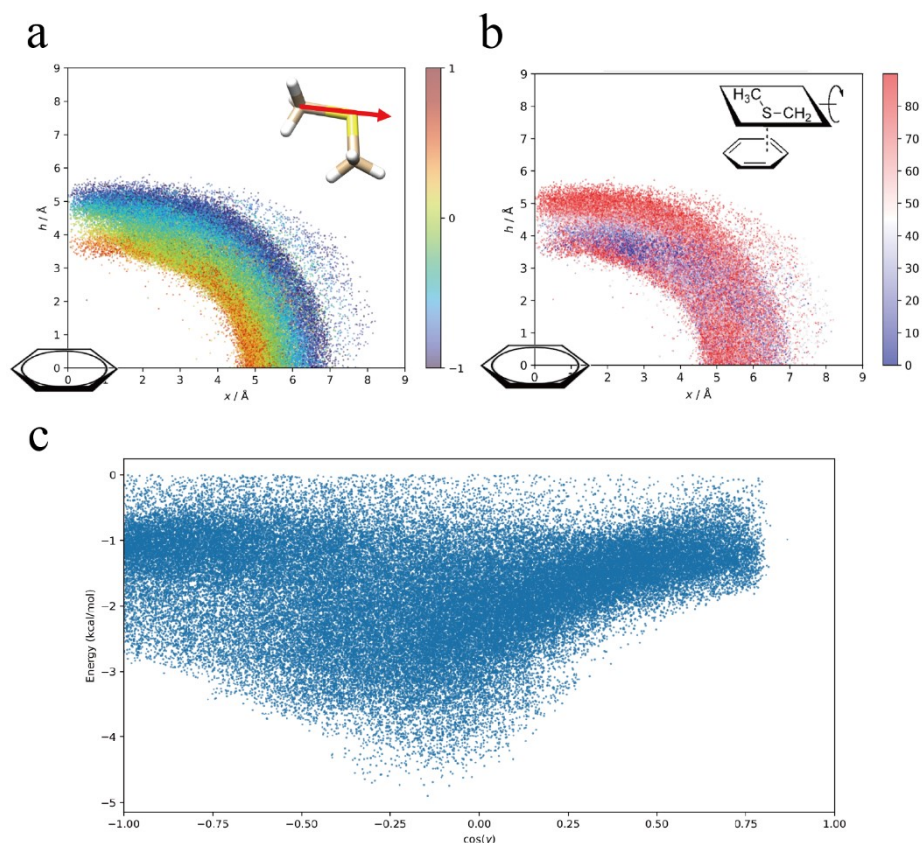

1

2 **Figure S6.** Radial distribution of MSM around aromatic rings, with  $x$  as the centroid shift (Å)  
 3 and  $h$  as the height above the plane (Å), with point colors indicating the trend of the geometric  
 4 parameter of interest. (a) Orientation distribution of the C→S vector. The color bar denotes  
 5 orientation ( $\cos\gamma$ ): values  $> 0$  (red) correspond to the C→S vector pointing toward the ring center,  
 6 whereas values  $< 0$  (blue) indicate the opposite direction. The inset (upper right) is the schematic  
 7 of the C–S bond definition. (b) Interplanar angle distribution between the plane of the MSM  
 8 fragment and the aromatic ring plane. The inset (upper right) illustrates the definition of the  
 9 MSM fragment plane used in the analysis. (c) Predicted interaction energies (kcal/mol) for MBZ-  
 10 MSM as a function of the C–S bond orientation ( $\cos\gamma$ , where 1 = toward the aromatic ring,  $-1 =$   
 11 away, 0 = parallel).

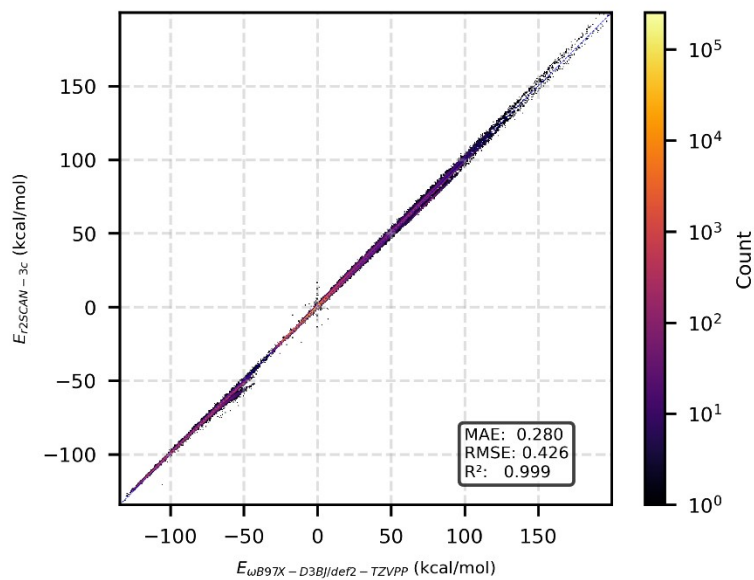

1

2 **Figure S7.** Comparison of noncovalent interaction energies calculated at the  
3  $\omega B97X-D3BJ/def2-TZVPP$  and  $r^2SCAN-3c$  levels for all dimers in the PDB-FRAGID dataset.

4

5

6

7

8

9

10

11

12

13

14

15

16

## 1 7 NCI Visualization

2 The Reduced Density Gradient (RDG) method<sup>4</sup> is used to visualize weak interactions. In this  
3 study, weak interaction analysis<sup>5</sup> was performed using the Multiwfn program<sup>6</sup>, and the  
4 corresponding visualizations were generated with VMD software<sup>7</sup>. In the weak interaction  
5 analysis, the gradient isosurfaces of the RDG function are typically colored on a scale ranging  
6 from blue-green to red, corresponding to interaction strength from strong attraction to strong  
7 repulsion. Blue regions indicate strong attractive interactions, green regions correspond to weak  
8 van der Waals interactions, and red regions denote strong steric repulsion.

9

10

11

12

13

14

15

16

17

# 1 8 Supporting Information Tables

2 **Table S1.** Data volume of each fragment

| Fragment type | Total number* | Training number**(%)*** |
|---------------|---------------|-------------------------|
| ACEM          | 4,830,133     | 533,043 (11.03)         |
| ACET          | 5,246,390     | 1,170,051 (22.30)       |
| ETAM          | 1,480,001     | 347,779 (23.50)         |
| ETOH          | 3,299,189     | 374,098 (11.34)         |
| ETSH          | 350,411       | 79,419 (22.66)          |
| MBZ           | 3,380,598     | 252,517 (7.47)          |
| MGDM          | 2,520,733     | 474,908 (18.84)         |
| Imidazole     | 1,377,566     | 284,607 (20.66)         |
| MIND          | 1,325,598     | 194,941 (14.71)         |
| PMPO          | 1,697,412     | 258,379 (15.22)         |
| MSM           | 949,756       | 141,498 (14.90)         |
| N1PA          | 1,103,276     | 179,516 (16.27)         |
| NMA           | 22,026,093    | 876,434 (3.98)          |
| PRPA          | 9,306,132     | 527,630 (5.67)          |
| HOH           | 3,561,146     | 327,658 (9.20)          |

3 \*The total number of occurrences in the original dataset.

4 \*\*The number of occurrences in the training set.

5 \*\*\*Percentage of total data used for training.

6

7

8

1 **Table S2.** Calculation time of each fragment

| Fragment Type | Time*(in hours)       |                        |           |
|---------------|-----------------------|------------------------|-----------|
|               | ωB97X-D3BJ/def2-TZVPP | r <sup>2</sup> SCAN-3c | PANIP     |
| ACEM          | 36 days, 20:03:14.2   | 5:58:16.3              | 0:39:18.0 |
| ACET          | 20 days, 9:32:51.3    | 5:48:37.5              | 0:37:32.9 |
| ETAM          | 45 days, 11:24:32.5   | 5:14:52.6              | 0:40:42.3 |
| ETOH          | 34 days, 18:38:02.8   | 4:53:28.3              | 0:39:19.3 |
| ETSH          | 29 days, 0:16:31.1    | 5:04:10.7              | 0:39:03.9 |
| MBZ           | 53 days, 17:01:56.3   | 8:05:08.1              | 0:44:10.8 |
| MGDM          | 66 days, 5:37:29.9    | 7:05:37.8              | 0:41:39.7 |
| MIMD          | 56 days, 10:43:06.7   | 7:28:09.5              | 0:40:31.7 |
| MIME          | 54 days, 12:43:22.4   | 7:22:51.6              | 0:41:42.3 |
| MIMM          | 58 days, 13:51:29.8   | 7:14:30.6              | 0:40:60.0 |
| MIND          | 108 days, 13:58:41.7  | 11:36:17.0             | 0:46:57.3 |
| PMPO          | 80 days, 17:58:59.7   | 9:09:32.6              | 0:44:01.9 |
| MSM           | 35 days, 0:20:00.7    | 4:58:28.8              | 0:39:58.2 |
| NIPA          | 94 days, 2:16:00.9    | 10:53:37.0             | 0:46:23.8 |
| NMA           | 47 days, 5:44:10.5    | 6:27:22.1              | 0:42:11.5 |
| PRPA          | 36 days, 13:47:55.2   | 5:08:38.6              | 0:41:15.4 |
| HOH           | 12 days, 21:28:45.8   | 3:09:31.4              | 0:35:22.9 |
| Total         | 463 days, 11:19:06.1  | 4days, 19:39:10.6      | 6:17:55.6 |

2 \*All benchmark calculations were performed on the computer cluster with an Intel Xeon  
3 Platinum 8368 CPU @ 2.60 GHz with 504 GB RAM.

4

5

6

1 **Table S3.** Calculation time of benchmark datasets

| Datasets                     | Time* (in minutes) |         |
|------------------------------|--------------------|---------|
|                              | PANIP              | AIMNet2 |
| Low-Energy Dataset           | 00:14.9            | 00:21.9 |
| Optimized Low-Energy Dataset | 00:09.4            | 00:14.5 |
| CSD                          | 09:52.9            | 12:10.9 |
| Randomly Generated Dataset   | 04:37.3            | 06:11.5 |
| Total                        | 14:54.5            | 18:58.8 |

2 \*All benchmark calculations were performed on the computer cluster with an NVIDIA GeForce  
3 RTX 4090 GPU with 24 GB VRAM, CUDA Version 12.9.

4

5

6

7

8

9

10

11

12

13

14

15

16

17

18 **Table S4.** Comparison of RMSE and MAE values for MLIP predictions across datasets curated

19 from the intermolecular interaction benchmark database<sup>8</sup> used in this study\*.

| Dataset                       | Size  | PANIP |      |                | AIMNet2 |       |                |
|-------------------------------|-------|-------|------|----------------|---------|-------|----------------|
|                               |       | MAE   | RMSE | R <sup>2</sup> | MAE     | RMSE  | R <sup>2</sup> |
| <b>Charged</b>                |       |       |      |                |         |       |                |
| DES370K-AIMNet2-elements      | 15069 | 0.35  | 0.46 | 0.99           | 0.56    | 0.82  | 0.98           |
| Ionic_H_bonds                 | 41    | 0.38  | 0.46 | 0.98           | 0.66    | 0.80  | 0.94           |
| NCIA_IHB100x10                | 64    | 0.51  | 0.59 | 0.99           | 1.12    | 1.74  | 0.95           |
| NENCI-2021-AIMNet2-elements   | 1719  | 0.36  | 0.47 | 0.99           | 0.75    | 1.03  | 0.98           |
| <b>Neutral</b>                |       |       |      |                |         |       |                |
| A24                           | 1     | 0.04  | 0.04 | N/A**          | 0.38    | 0.38  | N/A            |
| HB104                         | 12    | 0.55  | 0.62 | 0.79           | 0.75    | 0.90  | 0.56           |
| NCIA_D442x10-AIMNet2-elements | 380   | 0.46  | 0.54 | 0.87           | 16.45   | 43.36 | -855.01        |
| NCIA_HB300SPXx10              | 179   | 0.43  | 0.51 | 0.92           | 1.11    | 1.28  | 0.49           |
| NCIA_HB375x10                 | 884   | 0.43  | 0.51 | 0.96           | 0.65    | 0.89  | 0.88           |
| NCIA_R739x5-AIMNet2-elements  | 11    | 0.45  | 0.48 | 0.91           | 1.16    | 1.54  | 0.10           |
| R160x6                        | 113   | 0.36  | 0.44 | 0.94           | 0.69    | 1.04  | 0.66           |
| S66a8                         | 314   | 0.36  | 0.45 | 0.96           | 0.59    | 0.72  | 0.89           |
| S66x8                         | 305   | 0.36  | 0.45 | 0.97           | 0.65    | 0.83  | 0.91           |
| sulfurx8                      | 91    | 0.32  | 0.40 | 0.95           | 0.86    | 1.15  | 0.56           |

1 \*RMSE and MAE values are reported in units of kcal/mol.

2 \*\* For n = 1, R<sup>2</sup> is statistically meaningless owing to insufficient degrees of freedom and is  
3 therefore designated as “N/A”.

4 REFERENCES

- 1 (1) Daylight Theory: SMARTS - A Language for Describing Molecular Patterns.  
2 <https://www.daylight.com/dayhtml/doc/theory/theory.smarts.html> (accessed 2023-05-23).
- 3 (2) SMILES, a chemical language and information system. 1. Introduction to methodology  
4 and encoding rules | Journal of Chemical Information and Modeling.  
5 <https://pubs.acs.org/doi/10.1021/ci00057a005> (accessed 2023-05-23).
- 6 (3) RDKit. <http://www.rdkit.org/> (accessed 2023-05-23).
- 7 (4) Johnson, E. R.; Keinan, S.; Mori-Sánchez, P.; Contreras-García, J.; Cohen, A. J.; Yang,  
8 W. Revealing Noncovalent Interactions. *J. Am. Chem. Soc.* 2010, 132 (18), 6498–6506.  
9 <https://doi.org/10.1021/ja100936w>.
- 10 (5) Lu, T.; Chen, Q. Visualization Analysis of Weak Interactions in Chemical Systems. In  
11 *Comprehensive Computational Chemistry (First Edition)*; Yáñez, M., Boyd, R. J., Eds.; Elsevier:  
12 Oxford, 2024; pp 240–264. <https://doi.org/10.1016/B978-0-12-821978-2.00076-3>.
- 13 (6) Lu, T.; Chen, F. Multiwfn: A Multifunctional Wavefunction Analyzer. *Journal of*  
14 *Computational Chemistry* 2012, 33 (5), 580–592. <https://doi.org/10.1002/jcc.22885>.
- 15 (7) Humphrey, W.; Dalke, A.; Schulten, K. VMD: Visual Molecular Dynamics. *Journal of*  
16 *Molecular Graphics* 1996, 14 (1), 33–38. [https://doi.org/10.1016/0263-7855\(96\)00018-5](https://doi.org/10.1016/0263-7855(96)00018-5).
- 17 (8) Nayal, K. S.; Cho, I.; Isayev, O. Benchmarking Universal Machine-Learned Interatomic  
18 Potentials for Intermolecular and Noncovalent Interactions. *ChemRxiv* 2026 (0218).  
19 <https://doi.org/10.26434/chemrxiv.15000203/v1>.
